# Supplementary material for: Patient Privacy Perspectives on Health Information Exchange in a Mental Health Context: Qualitative Study
Source: PubMed Central journal article supplement (PMC6881785; doi:10.2196/13306), 2019-11-13
Supplement: mental_v6i11e13306_app1.pdf [file mental_v6i11e13306_app1.pdf]

## Pre-Interview Questionnaire

1. At which CAMH program are you currently receiving care?
  - a. Addictions Medicine Services
  - b. Ambulatory Addictions Services
  - c. Mood and Anxiety
  - d. Other: \_\_\_\_\_
  
2. What is your gender?
  - a. Male
  - b. Female
  - c. Transsexual
  - d. Transgendered
  - e. Gender-queer
  - f. Two-spirit
  - g. Female to Male
  - h. Male to Female
  - i. Intersex
  - j. Unsure
  - k. Questioning
  - l. Prefer not to answer
  - m. Other: \_\_\_\_\_
  
3. What is your Age?
  - a. 18-34
  - b. 35-44
  - c. 45-64
  - d. >65
  
4. How do you rate your health status (including mental health) in general?
  - a. Poor
  - b. Fair
  - c. Good
  - d. Very Good
  - e. Excellent
  
5. How often do you use the internet for personal use in a typical month?
  - a. At least once a day
  - b. At least once a week (but not every day)
  - c. At least once a month (but not every month)
  - d. Less than once a month
  
6. What do you use the internet for (circle all that apply)?
  - a. Purchasing (e.g., online shopping)
  - b. Information Seeking (e.g., news, hobbies, health, etc.)
  - c. Entertainment (e.g., music, movies, games)
  - d. Task/Services (e.g., banking, bills, personal information tasks, etc.)
  - e. Personal (e.g. Emails, instant messaging, social media)

7. Do you use the internet for any health-related activities?
  - a. Yes
  - b. No
  - c. If yes, please specify: \_\_\_\_\_
  
8. In general, people really do care about the well-being of others
  - a. Strongly Disagree
  - b. Disagree
  - c. Neither Disagree or Disagree
  - d. Agree
  - e. Strongly Agree
  
9. The typical person is sincerely concerned about the problems of others
  - a. Strongly Disagree
  - b. Disagree
  - c. Neither Disagree or Disagree
  - d. Agree
  - e. Strongly Agree
  
10. Most of the time, people care enough to try to be helpful, rather than just looking out for themselves.
  - a. Strongly Disagree
  - b. Disagree
  - c. Neither Disagree or Disagree
  - d. Agree
  - e. Strongly Agree
  
11. In general, most folks keep their promises
  - a. Strongly Disagree
  - b. Disagree
  - c. Neither Disagree or Disagree
  - d. Agree
  - e. Strongly Agree
  
12. I think people generally try to back up their words with their actions
  - a. Strongly Disagree
  - b. Disagree
  - c. Neither Disagree or Disagree
  - d. Agree
  - e. Strongly Agree
  
13. Most people are honest in their dealings with others
  - a. Strongly Disagree
  - b. Disagree
  - c. Neither Disagree or Disagree
  - d. Agree
  - e. Strongly Agree

14. I believe that most professional people do a very good job at their work
  - a. Strongly Disagree
  - b. Disagree
  - c. Neither Disagree or Disagree
  - d. Agree
  - e. Strongly Agree
  
15. Most professional are very knowledgeable in their chosen field
  - a. Strongly Disagree
  - b. Disagree
  - c. Neither Disagree or Disagree
  - d. Agree
  - e. Strongly Agree
  
16. A large majority of professional people are competent in their area of expertise
  - a. Strongly Disagree
  - b. Disagree
  - c. Neither Disagree or Disagree
  - d. Agree
  - e. Strongly Agree
  
17. I usually trust people until they give me a reason not to trust them
  - a. Strongly Disagree
  - b. Disagree
  - c. Neither Disagree or Disagree
  - d. Agree
  - e. Strongly Agree
  
18. I generally give people the benefit of the doubt when I first meet them
  - a. Strongly Disagree
  - b. Disagree
  - c. Neither Disagree or Disagree
  - d. Agree
  - e. Strongly Agree
  
19. My typical approach is to trust new acquaintances until they prove that I should not trust them.
  - a. Strongly Disagree
  - b. Disagree
  - c. Neither Disagree or Disagree
  - d. Agree
  - e. Strongly Agree
